# Supplementary material for: Effectiveness of workplace interventions with digital elements to reduce sedentary behaviours in office employees: a systematic review and meta-analysis
Source: PubMed Central journal article supplement (PMC11031993; doi:10.1186/s12966-024-01595-6), 2024-04-19

**Figure 2. Total sedentary behaviour reductions (min/8h workday)**

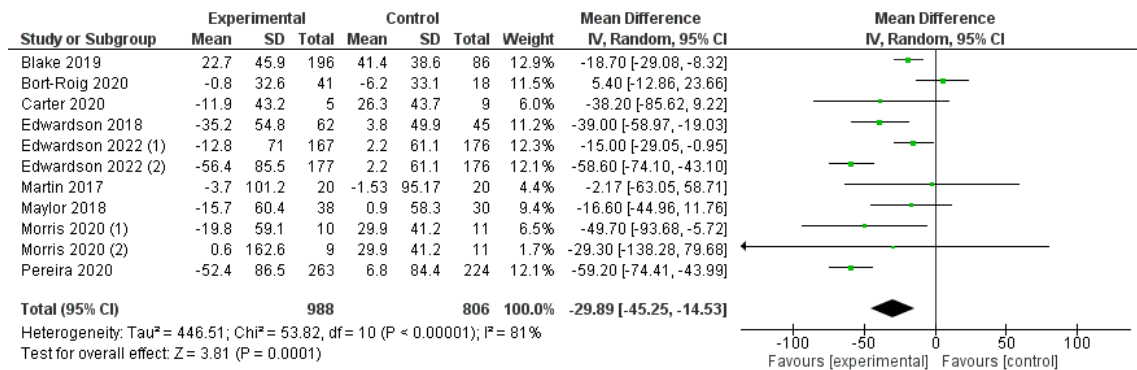

**Figure 3. Leave-one-out (Blake 2019)**

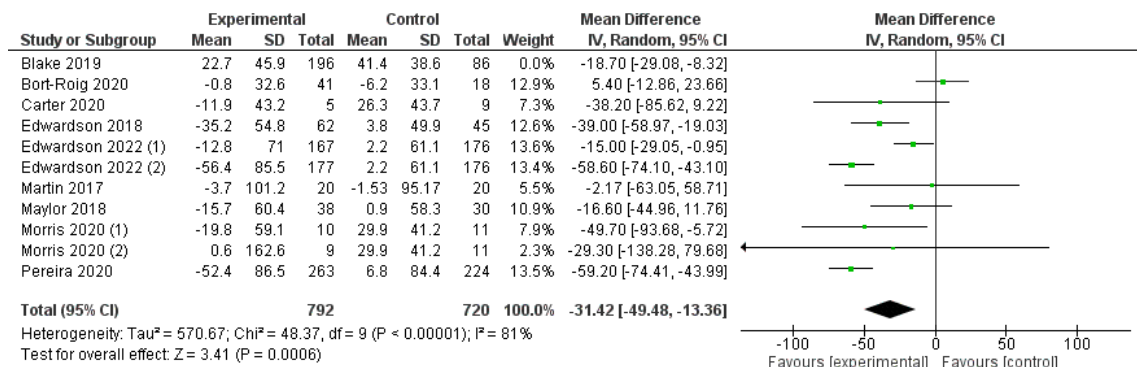

**Figure 4. Leave-one-out (Bort-Roig 2020)**

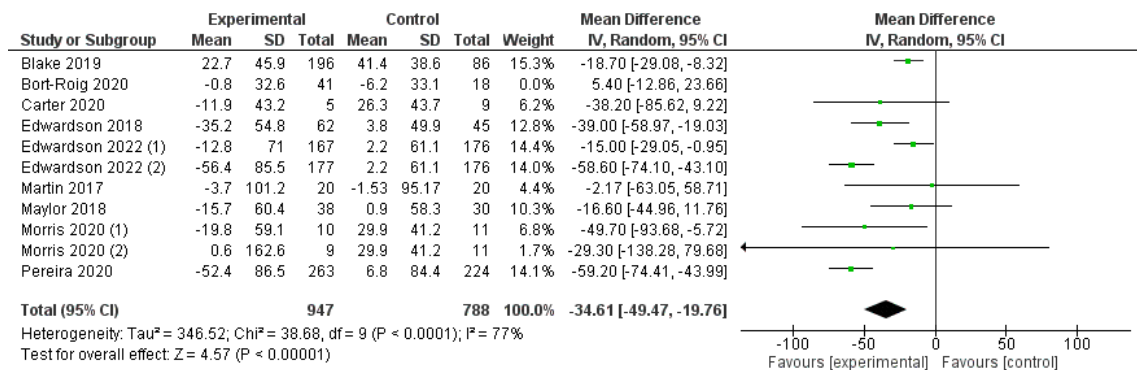

**Figure 5. Leave-one-out (Carter 2020)**

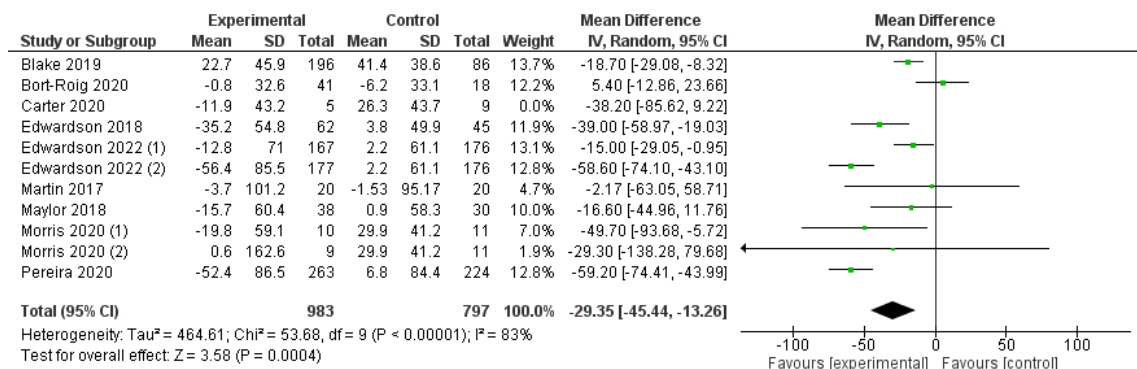

**Figure 6. Leave-one-out (Edwardson 2018)**

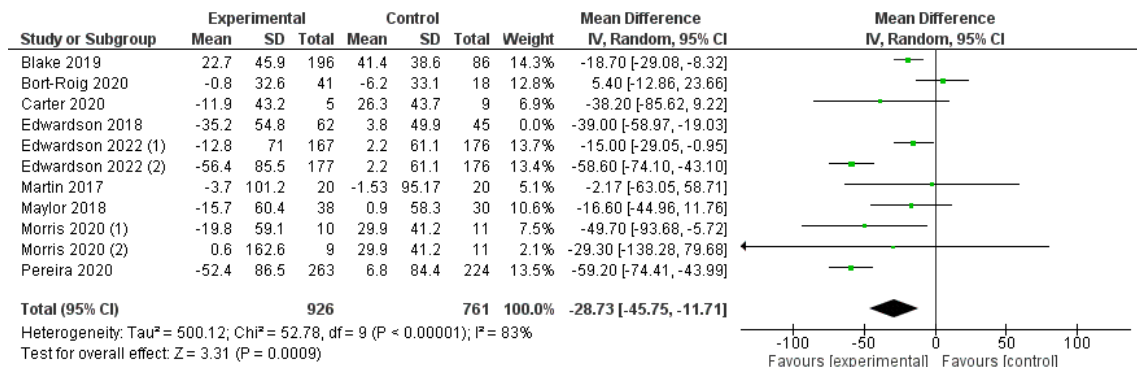

**Figure 7. Leave-one-out (Edwardson 2022-1)**

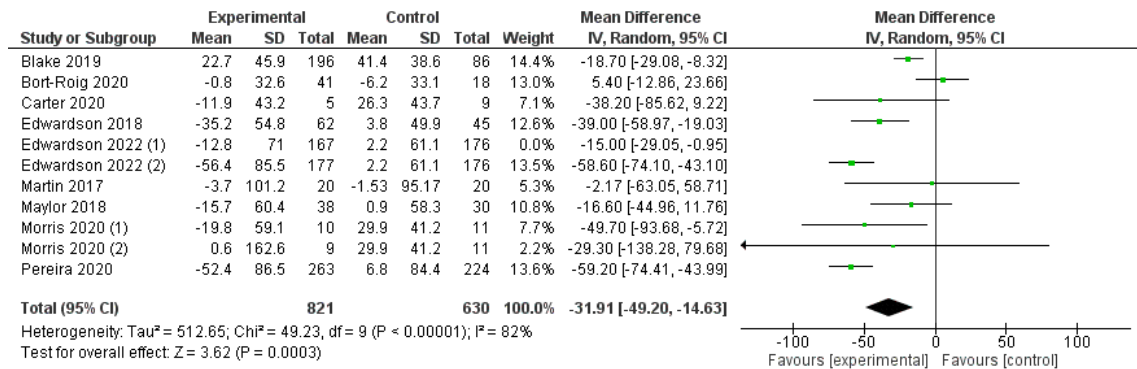

**Figure 8. Leave-one-out (Edwardson 2022-2)**

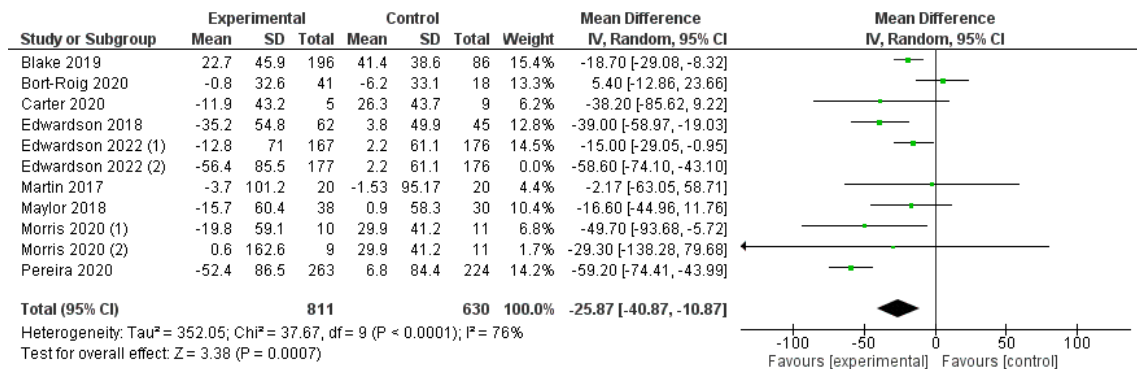

**Figure 9. Leave-one-out (Martin 2017)**

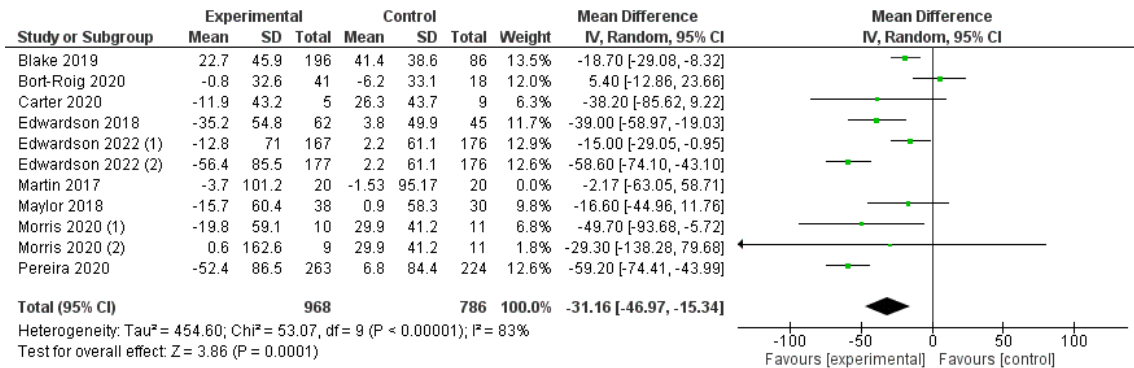

**Figure 10. Leave-one-out (Maylor 2018)**

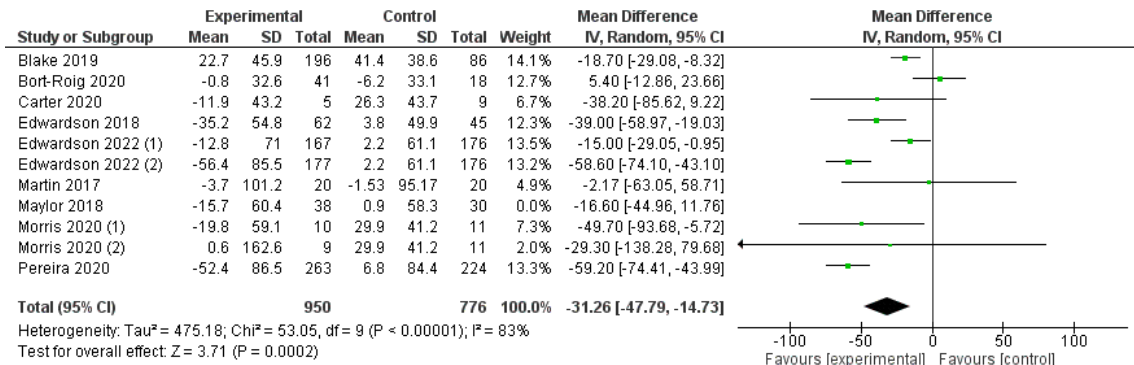

**Figure 11. Leave-one-out (Morris 2020-1)**

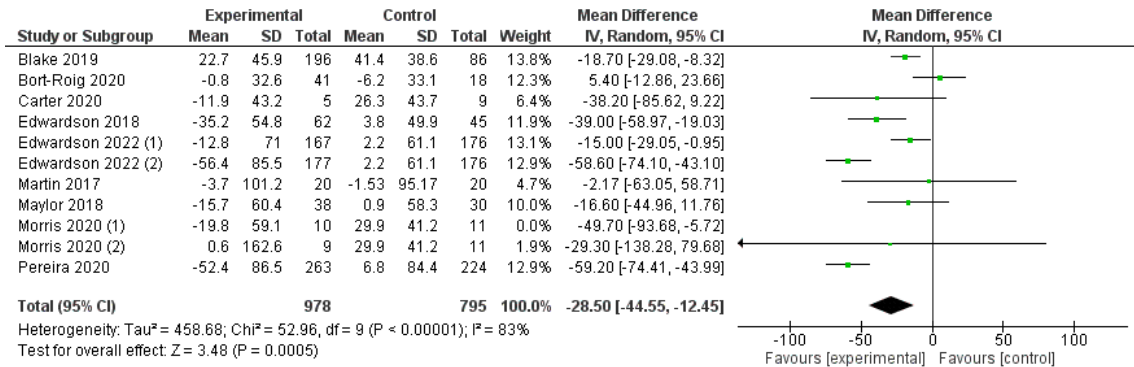

**Figure 12. Leave-one-out (Morris 2020-2)**

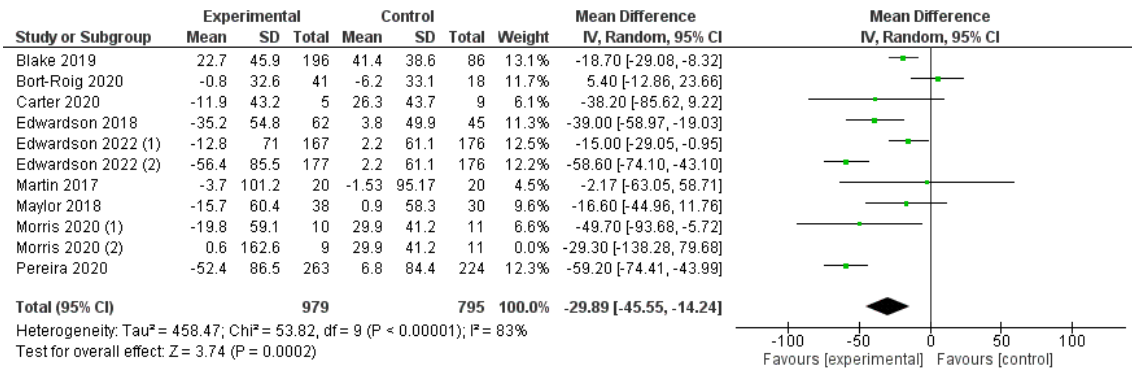

**Figure 13. Leave-one-out (Pereira 2020)**

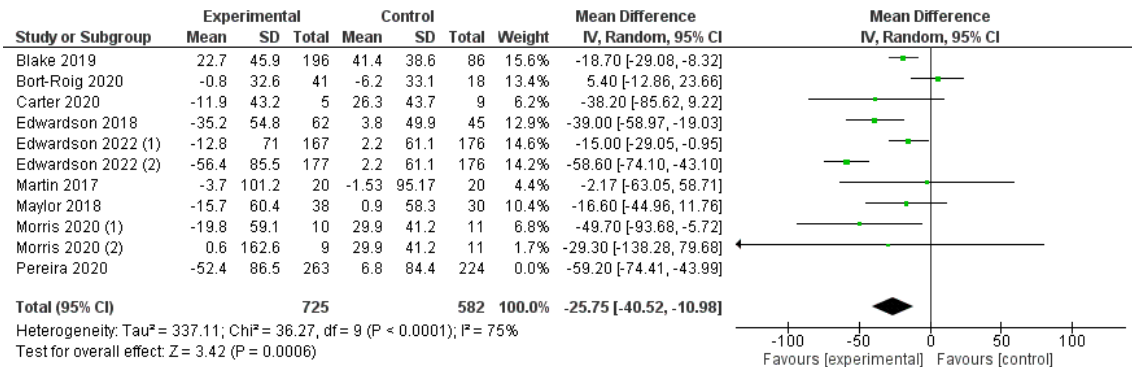

Supplement: 12966_2024_1595_MOESM1_ESM.pdf [file 12966_2024_1595_MOESM1_ESM.pdf]
